# Supplementary material for: Behavior and Welfare of Undocked Heavy Pigs Raised in Buildings with Different Ventilation Systems
Source: MDPI journal article supplement (doi:10.3390/ani11082338), 2021-08-08
Supplement: s1 [file s1]

**Date:**

**Farm:**

**Breeding stage:** Fattening (40 to 160 kg on average)

**Breed and/or genetics:**

**Presence of pigs with undocked tail:**

| N. | notes |
|----|-------|
|    |       |
|    |       |

**Number of employees**

- ☐ 0= 1 employee / < 2000 animals;
- ☐ 1= 1 employee / 2000-4000 animals;
- ☐ 2= 1 employee / > 4000 animals

**Education level of owner and employees**

- ☐ 0= at least five years of experience or educational qualifications and periodic training courses on animal welfare and practical instructions to all employees;
- ☐ 1= at least five years of experience or educational qualifications and training courses on animal welfare in the last three years and practical instructions to all employees;
- ☐ 2= less than five years of experience and no educational qualifications and/or no welfare training course or not even a single employee presence without practical instructions received.

**Procedures in case of tail biting outbreak:**

- ☐ 0= presence of written procedures and the employers were trained;
- ☐ 1= no written procedure but the employees were trained;
- ☐ 2= absence of both

**Emergency culling procedure:**

- ☐ 0= presence of written procedures and the employees were trained;
- ☐ 1= no written procedure but the employees were trained;
- ☐ 2= absence of both

**Feeding:**

**Water source:**

**Ventilation:**

- ☐ Natural
- ☐ Artificial
- ☐ Mixed

**Notes:**
