# Supplementary figures and images for: Behavior and Welfare of Undocked Heavy Pigs Raised in Buildings with Different Ventilation Systems
Source: MDPI journal article supplement (doi:10.3390/ani11082338), 2021-08-08

**Supplementary Figure S1.** The geometrical model used in the CFD simulations.

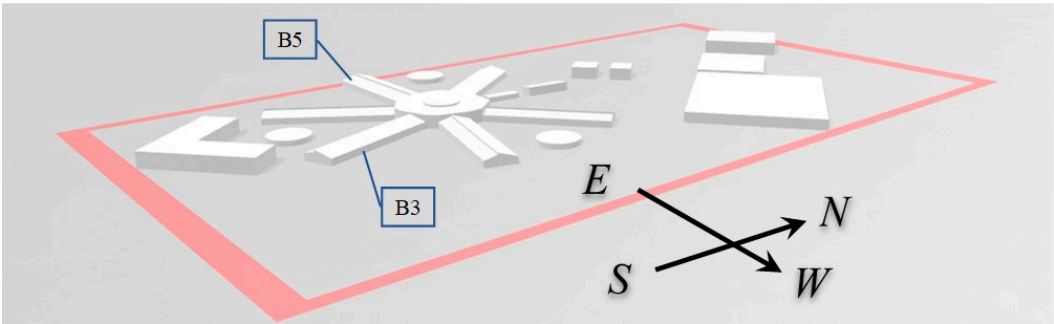

Supplement: s1 [file s1]

Supplementary Figure S2. Validation of the numerical model used for the CFD simulations.

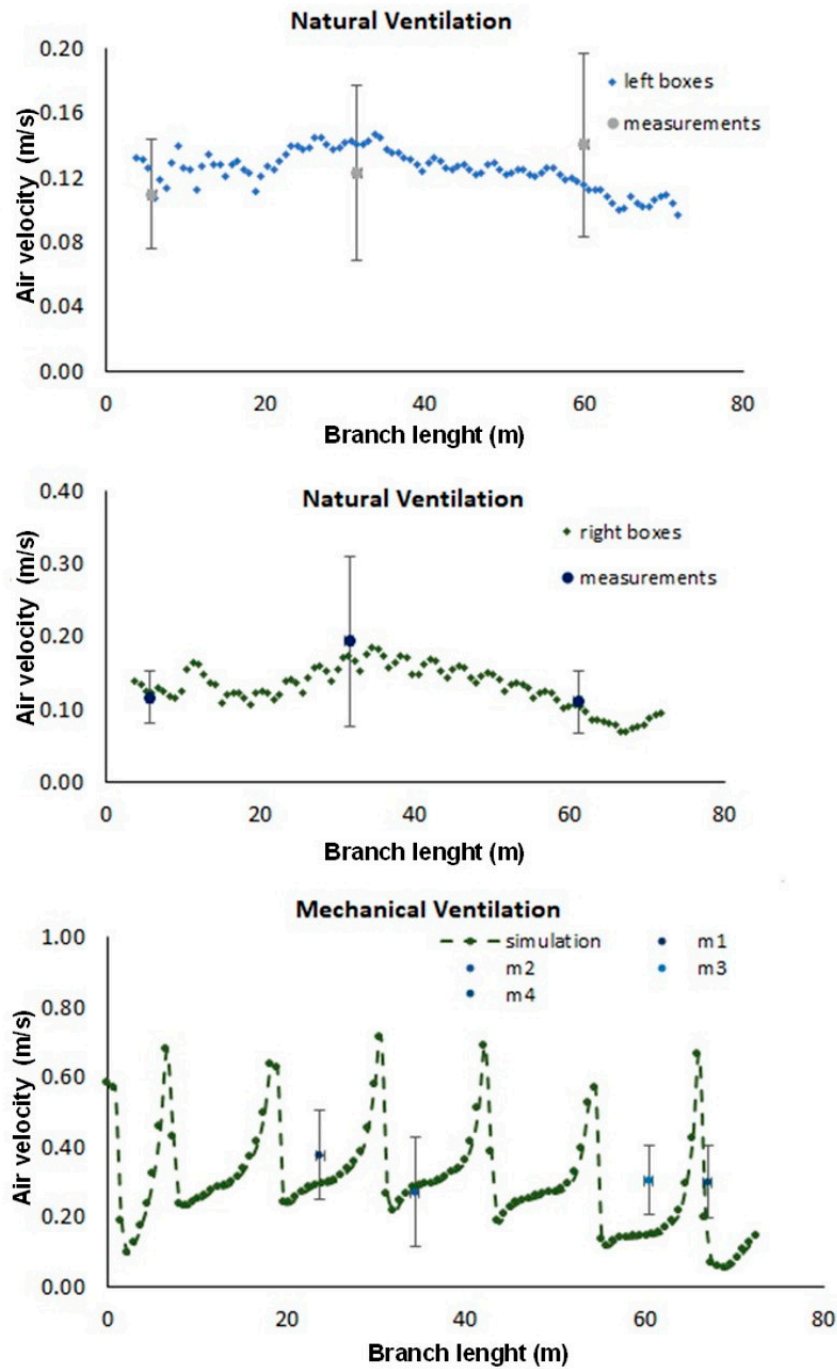

Supplement: s1 [file s1]
